# Supplementary material for: Fabricating Irrigators: Contested Hydrosocial Territories and Subject-Making in Spain’s Tagus–Segura Interbasin Transfer Arena
Source: MDPI journal article supplement (doi:10.3390/w16020192), 2024-01-05
Supplement: s1 [file s1]

Archive with 1 entries (1 files):
- water-2770867-supplementary.pdf
